# Supplementary material for: OncoCTMiner: streamlining precision oncology trial matching via molecular profile analysis
Source: Oxford University Press journal article supplement (doi:10.1093/database/baad077), 2023-01-01
Supplement: baad077_supp.zip [file baad077_supp.zip]

**Supplementary Table S1: Comparison of OncoCTMiner to other systems.**

| <b>Features</b>                   | <b>Systems</b> | <b>OncoCTMiner</b>                                                                          | <b>My Cancer Genome<sup>1</sup></b>                                              | <b>OCTANE<sup>2</sup></b>                                                           | <b>MatchMiner<sup>3</sup></b>                                 |
|-----------------------------------|----------------|---------------------------------------------------------------------------------------------|----------------------------------------------------------------------------------|-------------------------------------------------------------------------------------|---------------------------------------------------------------|
| <i>Terminologies / Ontologies</i> |                |                                                                                             |                                                                                  |                                                                                     |                                                               |
| Disease/Cancer                    |                | NCIt, MeSH, Disease Ontology, OncoTree                                                      | DiseaseOntology, NCIt, WHO, OncoTree, SNOMEDCT, UMLS                             | -                                                                                   | OncoTree                                                      |
| Gene                              |                | HGNC, NCBI-Gene                                                                             | RefSeq, UTA                                                                      | NCBI-Gene                                                                           | -                                                             |
| Alteration                        |                | CIViC, CGI, PMKB, DoCM, OncoPDSS, ClinVar, COSMIC                                           | HGVS, ISCN, UTA                                                                  | -                                                                                   | -                                                             |
| Chemical/Drug                     |                | DrugCentral, ChEBI, ChEMBL, PharmGKB, DrugBank,                                             | NCIt, NCIIm, SNOMED CT, DrugBank, VANDF                                          | NCIt                                                                                | -                                                             |
| Biomarker                         |                | Self-built terminology                                                                      | -                                                                                | -                                                                                   | -                                                             |
| Therapy                           |                | Self-built terminology                                                                      | -                                                                                | -                                                                                   | -                                                             |
| <i>Data Related</i>               |                |                                                                                             |                                                                                  |                                                                                     |                                                               |
| Trials Source(s)                  |                | ClinicalTrials.gov                                                                          | NCI-Supported Clinical Trials, UMIN Clinical Trials Registry, ClinicalTrials.gov | ClinicalTrials.gov, CORE                                                            | ClinicalTrials.gov                                            |
| Trials Content                    |                | Eligibility criteria, Meta data, Other detailed info                                        | Eligibility criteria, Meta data, Other detailed info                             | Eligibility criteria, Meta data, Other detailed                                     | Eligibility criteria, Meta data                               |
| <i>Entity-level criteria</i>      |                | Yes                                                                                         | Yes                                                                              | -                                                                                   | Yes                                                           |
| <i>Research Field</i>             |                | Cancer                                                                                      | Cancer                                                                           | Cancer                                                                              | Cancer                                                        |
| <i>Clinical trials</i>            |                | 460,952                                                                                     | 9,809                                                                            | 5,439                                                                               | -                                                             |
| <i>Disease/Cancer</i>             |                | 14,439                                                                                      | 955                                                                              | 252                                                                                 | -                                                             |
| <i>Gene</i>                       |                | 6,772                                                                                       | 18,271 (gene + alteration)                                                       | 779                                                                                 | -                                                             |
| <i>Alteration</i>                 |                | 4,691                                                                                       | -                                                                                | -                                                                                   | -                                                             |
| <i>Chemical/Drug</i>              |                | 13,749                                                                                      | 2,861                                                                            | 1,453                                                                               | -                                                             |
| <i>Biomarker</i>                  |                | 8                                                                                           | -                                                                                | -                                                                                   | -                                                             |
| <i>Therapy</i>                    |                | 1,401                                                                                       | -                                                                                | -                                                                                   | -                                                             |
| Trials Update                     |                | Monthly                                                                                     | Every two weeks                                                                  | Daily                                                                               | Daily                                                         |
| Data format                       |                | Structured, BioC-JSON based                                                                 | Structured, webpage based                                                        | Structured, Oracle database                                                         | Structured, CTML based                                        |
| <i>Functions</i>                  |                |                                                                                             |                                                                                  |                                                                                     |                                                               |
| Manual tagging function           |                | √                                                                                           | -                                                                                | -                                                                                   | -                                                             |
| Trials searching                  |                | √                                                                                           | √                                                                                | √                                                                                   | √                                                             |
| <i>Entity-based</i>               |                | √                                                                                           | √                                                                                | -                                                                                   | √                                                             |
| <i>Metadata-based</i>             |                | √                                                                                           | √                                                                                | -                                                                                   | √                                                             |
| Trials matching                   |                | √                                                                                           | -                                                                                | √                                                                                   | √                                                             |
| <i>Variant Annotation</i>         |                | √                                                                                           | -                                                                                | -                                                                                   | -                                                             |
| <i>VCF-supported</i>              |                | √                                                                                           | -                                                                                | -                                                                                   | -                                                             |
| <i>Patient-level</i>              |                | √                                                                                           | -                                                                                | -                                                                                   | √                                                             |
| Trials Filtering                  |                | √                                                                                           | -                                                                                | -                                                                                   | √                                                             |
| Trials Download                   |                | √                                                                                           | -                                                                                | -                                                                                   | -                                                             |
| RESTful API                       |                | Yes, open and free                                                                          | Yes, need license                                                                | -                                                                                   | -                                                             |
| Web-based open access             |                | Yes                                                                                         | Yes                                                                              | No                                                                                  | No                                                            |
| URL                               |                | <a href="https://oncoctminer.chosenmedinfo.com/">https://oncoctminer.chosenmedinfo.com/</a> | <a href="https://www.mycancergenome.org/">https://www.mycancergenome.org/</a>    | <a href="https://pct.mdanderson.org/octane/">https://pct.mdanderson.org/octane/</a> | <a href="https://matchminer.org/">https://matchminer.org/</a> |

(to be continued)

(continue)

| DQueST <sup>4</sup>                                                                                         | Criteria2Query <sup>5</sup>                                                                     | EiilE <sup>6</sup>               | DCMS <sup>7</sup>                                    |
|-------------------------------------------------------------------------------------------------------------|-------------------------------------------------------------------------------------------------|----------------------------------|------------------------------------------------------|
| OMOP concepts                                                                                               | OMOP concepts                                                                                   | OMOP concepts, SNOMED-CT, LOINC  | -                                                    |
| -                                                                                                           | -                                                                                               | No                               | -                                                    |
| -                                                                                                           | -                                                                                               | No                               | -                                                    |
| OMOP concepts                                                                                               | OMOP concepts                                                                                   | OMOP concepts                    | -                                                    |
| -                                                                                                           | -                                                                                               | -                                | -                                                    |
| -                                                                                                           | -                                                                                               | -                                | -                                                    |
| ClinicalTrials.gov                                                                                          | ClinicalTrials.gov criteria, user-entered criteria                                              | ClinicalTrials.gov               | MSKCC therapeutic clinical trials                    |
| Eligibility criteria                                                                                        | Eligibility criteria                                                                            | Eligibility criteria             | Eligibility criteria, Meta data, Other detailed info |
| -                                                                                                           | -                                                                                               | -                                | -                                                    |
| Does not focus on specific field                                                                            | Does not focus on specific field                                                                | Does not focus on specific field | Cancer                                               |
| 252,330                                                                                                     | -                                                                                               | 230 (training set)               | 840                                                  |
| -                                                                                                           | -                                                                                               | -                                | Not mentioned                                        |
| Not mentioned                                                                                               | -                                                                                               | -                                | Not mentioned                                        |
| Not mentioned                                                                                               | -                                                                                               | -                                | Not mentioned                                        |
| -                                                                                                           | -                                                                                               | -                                | Not mentioned                                        |
| -                                                                                                           | -                                                                                               | -                                | -                                                    |
| -                                                                                                           | -                                                                                               | -                                | -                                                    |
| Not mentioned                                                                                               | -                                                                                               | -                                | Daily                                                |
| Not mentioned                                                                                               | Structured, JSON based                                                                          | Structured, XML based            | Structured                                           |
| -                                                                                                           | -                                                                                               | -                                | -                                                    |
| √                                                                                                           | -                                                                                               | -                                | -                                                    |
| √                                                                                                           | -                                                                                               | -                                | -                                                    |
| Yes, dynamic questionnaire                                                                                  | -                                                                                               | -                                | -                                                    |
| No                                                                                                          | -                                                                                               | -                                | √                                                    |
| No                                                                                                          | -                                                                                               | -                                | -                                                    |
| No                                                                                                          | -                                                                                               | -                                | -                                                    |
| No                                                                                                          | -                                                                                               | -                                | √                                                    |
| √                                                                                                           | -                                                                                               | -                                | -                                                    |
| -                                                                                                           | √                                                                                               | -                                | -                                                    |
| -                                                                                                           | Yes                                                                                             | -                                | -                                                    |
| Website unavailable                                                                                         | Website unavailable                                                                             | -                                | No                                                   |
| <a href="https://impact.dbmi.columbia.edu/dquest-flask/">https://impact.dbmi.columbia.edu/dquest-flask/</a> | <a href="http://www.ohdsi.org/web/criteria2query/">http://www.ohdsi.org/web/criteria2query/</a> | -                                | -                                                    |

Note:

1 The comparative data of My Cancer Genome is derived from:

a) Holt, M.E., Mittendorf, K.F., LeNoue-Newton, M., Jain, N.M., Anderson, I., Lovly, C.M., Osterman, T., Micheel, C. and Levy, M. (2021) My Cancer Genome: Coevolution of Precision Oncology and a Molecular Oncology Knowledgebase. JCO Clin Cancer Inform, 5, 995-1004.

b) <https://www.mycancergenome.org>

2 The comparative data of OCTANE is derived from:

a) Zeng, J., Shufean, M.A., Khotskaya, Y., Yang, D., Kahle, M., Johnson, A., Holla, V., Sanchez, N., Mills Shaw, K.R., Bernstam, E.V. et al. (2019) OCTANE: Oncology Clinical Trial Annotation Engine. JCO Clin Cancer Inform, 3, 1-11.

b) <https://pct.mdanderson.org>

3 The comparative data of MatchMiner is derived from:

a) Klein, H., Mazor, T., Siegel, E., Trukhanov, P., Ovalle, A., Vecchio Fitz, C.D., Zwiesler, Z., Kumari, P., Van Der Veen, B., Marriott, E. et al. (2022) MatchMiner: an open-source platform for cancer precision medicine. NPJ Precis Oncol, 6, 69.

b) <https://matchminer.org>

4 The comparative data of DQueST is derived from:

a) Liu, C., Yuan, C., Butler, A.M., Carvajal, R.D., Li, Z.R., Ta, C.N. and Weng, C. (2019) DQueST: dynamic questionnaire for search of clinical trials. J Am Med Inform Assoc, 26, 1333-1343.

b) <https://impact.dbmi.columbia.edu/dquest-flask>

5 The comparative data of Criteria2Query is derived from:

a) Yuan, C., Ryan, P.B., Ta, C., Guo, Y., Li, Z., Hardin, J., Makadia, R., Jin, P., Shang, N., Kang, T. et al. (2019) Criteria2Query: a natural language interface to clinical databases for cohort definition. J Am Med Inform Assoc, 26, 294-305.

b) <http://www.ohdsi.org/web/criteria2query>

6 The comparative data of EliIE is derived from:

a) Kang, T., Zhang, S., Tang, Y., Hruby, G.W., Rusanov, A., Elhadad, N. and Weng, C. (2017) EliIE: An open-source information extraction system for clinical trial eligibility criteria. J Am Med Inform Assoc, 24, 1062-1071.

7 The comparative data of DCMS is derived from:

a) Eubank, M.H., Hyman, D.M., Kanakamedala, A.D., Gardos, S.M., Wills, J.M. and Stetson, P.D. (2016) Automated eligibility screening and monitoring for genotype-driven precision oncology trials. J Am Med Inform Assoc, 23, 777-781.

\* The '-' in each cell indicates that the information is not available or that the feature does not exist.
